# Supplementary material
Source: PubMed Central journal article supplement (PMC4937508)
Supplement: 10.1074_M116.058800_mcp.M116.058800-4.pdf [file 10.1074_M116.058800_mcp.M116.058800-4.pdf]

## Supplemental Experimental Procedures

**Genetic manipulations.** The *N. gonorrhoeae* FA1090 genome sequence (NC\_002946) was used as a template to design oligonucleotides using Geneious 7 software. All oligonucleotides were synthesized by Integrated DNA Technologies and are listed in Supplemental Table S2. Genomic DNA was isolated from *N. gonorrhoeae* FA1090 using the Wizard Genomic DNA Purification Kit (Promega). Plasmid DNA and PCR products were purified with the QIAprep Spin Miniprep Kit (QIAGEN). The individual PCRs were performed with the FA1090 chromosomal DNA as a template, the appropriate primers, and Q5<sup>®</sup> High-Fidelity DNA Polymerase (NEB). Constructs were introduced into pilated FA1090 by transformation (1). All FA1090 mutant derivatives were selected on GCB supplemented with kanamycin or kanamycin, erythromycin and 100  $\mu$ M isopropyl- $\beta$ -D-thiogalactoside (IPTG). The obtained constructs and the presence of desired mutations were verified by sequencing at the Center for Genome Research and Biocomputing at Oregon State University.

**Construction of *ngo1801 (bamA)*, *ngo0277 (bamD)*, and *ngo1955 (tamA)* conditional knockouts.** The conditional mutant strains were constructed by placing an additional copy of the gene of interest under the control of the IPTG-inducible promoter,  $P_{lac}$ , within an intergenic region located between *lctP* and *aspC* in the FA1090 chromosome (2), and a subsequent in-frame replacement of the respective gene in its native locus with the nonpolar kanamycin resistance cassette derived from pKD4 (3).

Specifically, FA1090  $\Delta bamA P_{lac}::bamA$ , was constructed in the following steps. First, the additional copy of *bamA* was amplified with primers *bamA*-up and *bamA*-down and the PCR product was cloned under the control of  $P_{lac}$ , carried on pGCC4 (4) yielding pGCC4-*bamA*. To replace the chromosomal *bamA* with a kanamycin cassette, plasmid pNEB193- $\Delta bamA$  was created using the Gibson Assembly method (5). DNA fragments containing 1 kb

upstream and 1 kb downstream from *bamA* gene, as well as the kanamycin resistance gene from pKD4 (3), were amplified using the primers listed in Supplemental Table S2. Plasmid pNEB193 (NEB) was linearized using PCR and the Gibson Assembly Master Mix (NEB) was applied to assemble all fragments according to the manufacturer's recommendation. Finally, *Scal*-linearized pNEB193- $\Delta$ *bamA* was used for allelic exchange of *bamA* in strain FA1090 carrying pGCC4- $P_{lac}::bamA$ .

The FA1090  $\Delta$ *tamA*  $P_{lac}::tamA$  was engineered by placing an additional copy of *tamA* on the chromosome using pGCC4- $P_{lac}::tamA$ , which was created by the amplification of *tamA* using primers *tamA\_pGCC\_fwd* and *tamA\_pGCC\_rev*, digesting the 1926 bp PCR fragment with *FseI*, and cloning into the *FseI/Scal*-cut pGCC4 vector. The obtained plasmid pGCC4- $P_{lac}::tamA$  was used in the transformation of pilated FA1090. The constructs for *tamA* deletion via homologous recombination were created by amplification of the region upstream and downstream from *tamA* with oligonucleotides *NGO1956\_up\_fwd* and *NGO1956\_up\_rev*, and *NGO1956\_down\_fwd* and *NGO1956\_down\_rev*, respectively. The PCR product corresponding to the upstream region was treated with *EcoRI* and *KpnI* and ligated into similarly prepared pUC18K to generate pUC18K-*tamA*<sub>up</sub>. The DNA fragments encompassing the downstream region from *tamA* and pUC18K-*tamA*<sub>up</sub> were treated with *BamHI* and *HindIII* and ligated to create pUC18K- $\Delta$ *tamA*. Finally, linearized pUC18K- $\Delta$ *tamA* was used to transform FA1090  $P_{lac}::tamA$  to create FA1090  $\Delta$ *tamA*  $P_{lac}::tamA$ .

To generate the FA1090  $\Delta$ *bamD*  $P_{lac}::bamD$  knockout strain, the DNA fragment containing the entire *bamD* with the native ribosomal binding site was amplified with oligonucleotides *bamD\_rbs\_fwd* and *bamD\_rbs\_rev*. The 834 bp fragment was digested with *FseI* and cloned into *FseI/Scal* treated pGCC4, yielding pGCC4- $P_{lac}::bamD$ . Wild type pilated FA1090 was transformed with the resulting plasmid to generate FA1090 carrying  $P_{lac}::bamD$ .

The 577 bp upstream from the *bamD* encoding region were amplified using primers *bamD\_up\_fwd* and *bamD\_up\_rev*, and the PCR product was cloned into EcoRI-KpnI-digested pUC18K (6), resulting in pUCK18K-*bamDup*. The fragment downstream of *bamD* was amplified with *bamD\_down\_fwd* and *bamD\_down\_rev* and the 565 bp DNA fragment was cloned into BamHI-HindIII-digested pUC18K-*bamDup*, yielding pUC18K- $\Delta$ *bamD*. This plasmid was subsequently used for deletion of *bamD* in *N. gonorrhoeae* FA1090  $P_{lac}::bamD$  using homologous recombination.

**Construction of in-frame deletion mutants  $\Delta$ *ngo2054* and  $\Delta$ *ngo0994* (lipid modified azurin protein, *laz*).** To engineer the FA1090 strain lacking NGO2054, the upstream region of the NGO2054 gene was amplified with primers *NGO2054\_up\_fwd* and *NGO2054\_up\_rev*. The 533 bp PCR product was digested with EcoRI-KpnI and ligated into the pUC18K vector (6), generating pUC18K-*ngo2054up*. The downstream region of NGO2054 was amplified with primers *NGO2054\_down\_fwd* and *NGO2054\_down\_rev*. The 531 bp PCR product was cloned into pUC18K-*ngo2054up* after digestion with BamHI and SphI, resulting in pUC18K- $\Delta$ *ngo2054*. The pUC18K- $\Delta$ *ngo2054* linearized with NdeI was used for *N. gonorrhoeae* transformation. Colonies that arose on GCB containing kanamycin were picked for verification by PCR using primers *NGO2054\_ch\_fwd* and *NGO2054\_ch\_rev*.

The FA1090  $\Delta$ *laz* strain was engineered as follows. The chromosomal DNA fragments located upstream (585 bp) and downstream (571 bp) from NGO0994 were amplified with primers *NGO0994\_up\_fwd* and *NGO0994\_up\_rev*, and *NGO0994\_down\_fwd* and *NGO0994\_down\_rev*; respectively. The 585 bp PCR product was cloned into pUC18K digested with EcoRI and KpnI, yielding pUCK18K-*ngo0994up*. The 571 bp product was digested with XbaI and PstI and cloned into likewise cut pUCK18K-*ngo0994up*. The resulting pUC18K- $\Delta$ *ngo0994* was linearized and used in transformation of wild type FA1090.

To complement the FA1090  $\Delta ngo2054$  and  $\Delta laz$ , the genes were amplified with primers NGO2054\_pGCC\_fwd, NGO2054\_pGCC\_rev and NGO0994\_pGCC\_fwd, NGO0994\_pGCC\_rev, respectively. The PCR products were digested with FseI, and cloned into FseI-ScaI-treated pGCC4. Finally, the obtained pGCC4-*ngo2054* and pGCC4-*laz* were used to transform the FA1090  $\Delta ngo2054$  and FA1090  $\Delta laz$ , respectively. The construction of the FA1090  $\Delta ngo2139$  strain was previously described (7) and complementation was accomplished according to the scheme described above using primers NGO2139\_pGCC\_fwd and NGO2139\_pGCC\_rev (Supplemental Table S2).

## References

1. Dillard, J. P. (2011) Genetic manipulation of *Neisseria gonorrhoeae*. Curr. Protoc. Microbiol. Chapter 4, Unit4A 2
2. Mehr, I. J., Long, C. D., Serkin, C. D., and Seifert, H. S. (2000) A homologue of the recombination-dependent growth gene, *rdgC*, is involved in gonococcal pilin antigenic variation. Genetics 154, 523-532
3. Datsenko, K. A., and Wanner, B. L. (2000) One-step inactivation of chromosomal genes in *Escherichia coli* K-12 using PCR products. Proc. Natl. Acad. Sci. U S A 97, 6640-6645
4. Mehr, I. J., and Seifert, H. S. (1998) Differential roles of homologous recombination pathways in *Neisseria gonorrhoeae* pilin antigenic variation, DNA transformation and DNA repair. Mol. Microbiol. 30, 697-710
5. Gibson, D. G. (2009) Synthesis of DNA fragments in yeast by one-step assembly of overlapping oligonucleotides. Nucleic Acids Res. 37, 6984-6990

6. Menard, R., Sansonetti, P. J., and Parsot, C. (1993) Nonpolar mutagenesis of the ipa genes defines IpaB, IpaC, and IpaD as effectors of *Shigella flexneri* entry into epithelial cells. *J Bacteriol* 175, 5899-5906
7. Zielke, R. A., Wierzbicki, I. H., Weber, J. V., Gafken, P. R., and Sikora, A. E. (2014) Quantitative proteomics of the *Neisseria gonorrhoeae* cell envelope and membrane vesicles for the discovery of potential therapeutic targets. *Mol Cell Proteomics* 13, 1299-1317
