# Supplementary material
Source: PubMed Central journal article supplement (PMC4937508)

Figure S1

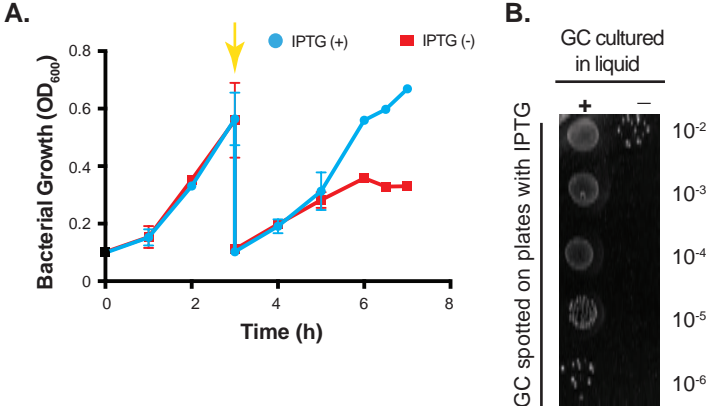

Supplement: 10.1074_M116.058800_mcp.M116.058800-1.pdf [file 10.1074_M116.058800_mcp.M116.058800-1.pdf]

Figure S2

A.

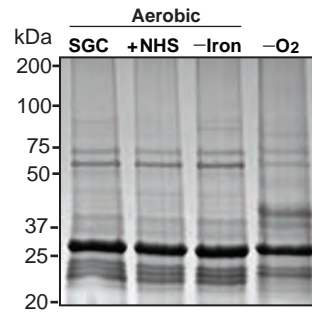

B.

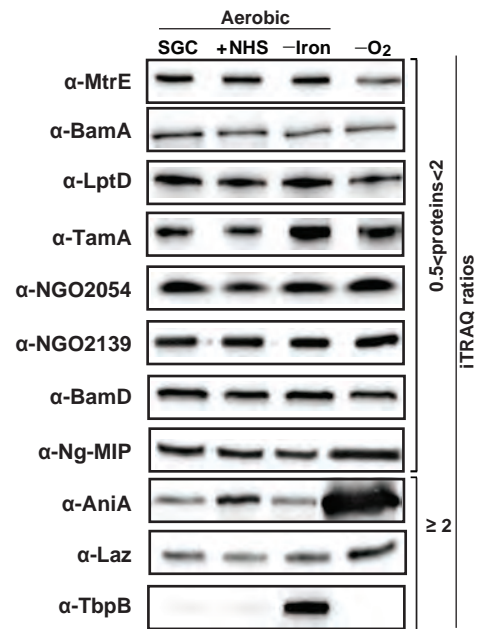

Supplement: 10.1074_M116.058800_mcp.M116.058800-2.pdf [file 10.1074_M116.058800_mcp.M116.058800-2.pdf]

Figure S3

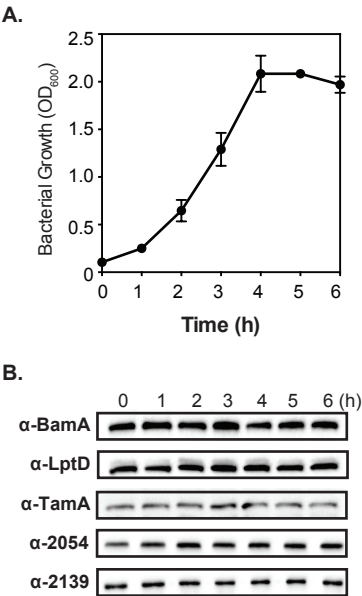

Supplement: 10.1074_M116.058800_mcp.M116.058800-3.pdf [file 10.1074_M116.058800_mcp.M116.058800-3.pdf]
